# Supplementary material for: Evaluation of mixed quantum–classical molecular dynamics on cis-azobenzene photoisomerization
Source: Royal Society of Chemistry journal article supplement (doi:10.1039/d1cp01374b), 2021-01-01
Supplement: d1cp01374b1.pdf [file d1cp01374b1.pdf]

# Supplementary Information for: Evaluation of Mixed Quantum-Classical Molecular Dynamics on *cis*-Azobenzene Photoisomerization

Diandong Tang, Lin Shen\* and Wei-Hai Fang

*Key Laboratory of Theoretical and Computational Photochemistry of Ministry of  
Education, College of Chemistry, Beijing Normal University, Beijing 100875, China*

E-mail: lshen@bnu.edu.cn

# Collective Dynamics of PC-FBD & PC-EBD

Table S1: Simulation results using PC-FBD and PC-EBD in comparison with experimental results.

| MQC Method | Decoherence | Rescaling        | $S_1$ lifetime $\pm$ standard error (fs) | <i>trans</i> -isomer yield |
|------------|-------------|------------------|------------------------------------------|----------------------------|
| FSSH       | PC-EBD      | $E+$             | $93.0 \pm 0.4$                           | 0.522                      |
|            |             | $E\mathbf{p}_h+$ | $65.0 \pm 0.4$                           | 0.675                      |
|            |             | $E\mathbf{p}_h-$ | $67.3 \pm 0.4$                           | 0.570                      |
|            | PC-FBD      | $E+$             | $92.5 \pm 0.3$                           | 0.486                      |
|            |             | $E\mathbf{p}_h+$ | $66.1 \pm 0.4$                           | 0.665                      |
|            |             | $E\mathbf{p}_h-$ | $67.4 \pm 0.4$                           | 0.575                      |
| expr.      |             | 100-170          | 0.40-0.75                                |                            |

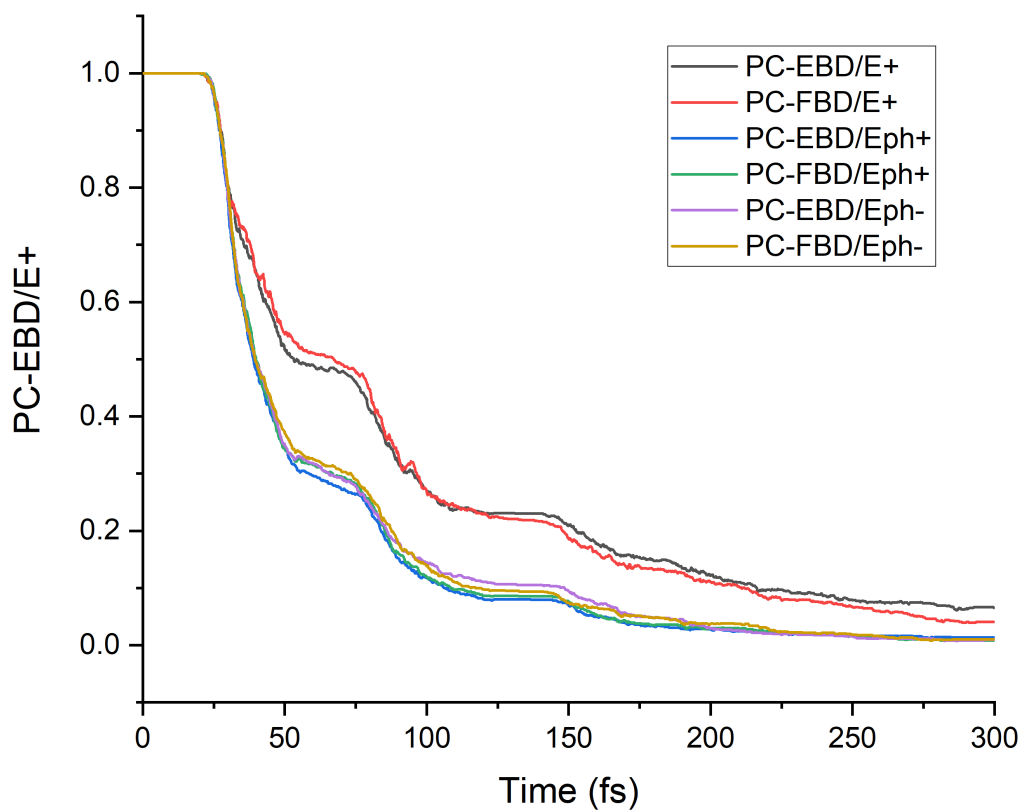

Figure S1: Time-dependent electronic state populations obtained using PC-EBD and PC-FBD.

# Representative Trajectories for all Simulations

Table S2: List of Representative Trajectories

|                           |             |                     |             |
|---------------------------|-------------|---------------------|-------------|
| FSSH/E+                   | Figure 3(a) | EMF                 | Figure 5(a) |
| FSSH/ $E\mathbf{p}_h+$    | Figure S2   | PC-EMF              | Figure 5(b) |
| FSSH/ $E\mathbf{p}_h-$    | Figure S3   | MFSD                | Figure 5(c) |
| EBD/E+                    | Figure S4   | PC-MFSD             | Figure S20  |
| EBD/ $E\mathbf{p}_h+$     | Figure S5   | PC-BCMF             | Figure 5(d) |
| EBD/ $E\mathbf{p}_h-$     | Figure S6   | QTMF <sup>a</sup>   | Figure 5(e) |
| FBD/E+                    | Figure 3(c) | QTMF <sup>b</sup>   | Figure S21  |
| FBD/ $E\mathbf{p}_h+$     | Figure 4(a) | MM/SQC <sup>c</sup> | Figure 6(a) |
| FBD/ $E\mathbf{p}_h-$     | Figure 4(b) | MM/SQC <sup>d</sup> | Figure 6(b) |
| PCSH/E+                   | Figure 3(b) |                     |             |
| PCSH/ $E\mathbf{p}_h+$    | Figure S7   |                     |             |
| PCSH/ $E\mathbf{p}_h-$    | Figure S8   |                     |             |
| BCSH/E+                   | Figure S9   |                     |             |
| BCSH/ $E\mathbf{p}_h+$    | Figure S10  |                     |             |
| BCSH/ $E\mathbf{p}_h-$    | Figure S11  |                     |             |
| PC-BCSH/E+                | Figure 3(d) |                     |             |
| PC-BCSH/ $E\mathbf{p}_h+$ | Figure S12  |                     |             |
| PC-BCSH/ $E\mathbf{p}_h-$ | Figure S13  |                     |             |
| PC-EBD/E+                 | Figure S14  |                     |             |
| PC-EBD/ $E\mathbf{p}_h+$  | Figure S15  |                     |             |
| PC-EBD/ $E\mathbf{p}_h-$  | Figure S16  |                     |             |
| PC-FBD/E+                 | Figure S17  |                     |             |
| PC-FBD/ $E\mathbf{p}_h+$  | Figure S18  |                     |             |
| PC-FBD/ $E\mathbf{p}_h-$  | Figure S19  |                     |             |

(a) Decoherence rate was fixed as 0.001. (b) Decoherence rate was determined on-the-fly.  
(c) Linear window function with parameter as 0.500. (d) Square window function with parameter as 0.366.

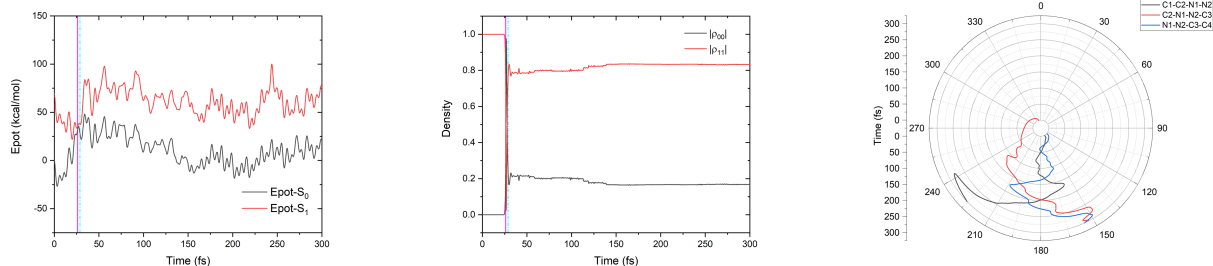

Figure S2: Time evolution of adiabatic potential energy (left), electronic populations (middle) and the dihedral angles C1-C2-N1-N2, C2-N1-N2-C3 and N1-N2-C3-C4 (right) for FSSH/ $E_{P_h+}$ .

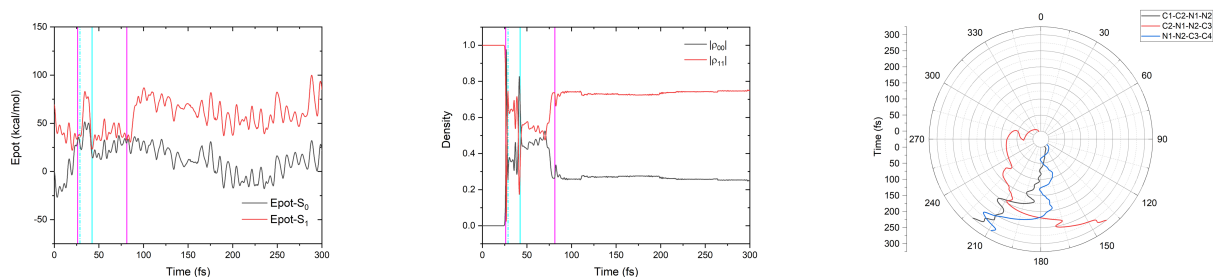

Figure S3: Time evolution of adiabatic potential energy (left), electronic populations (middle) and the dihedral angles C1-C2-N1-N2, C2-N1-N2-C3 and N1-N2-C3-C4 (right) for FSSH/ $E_{P_h-}$ .

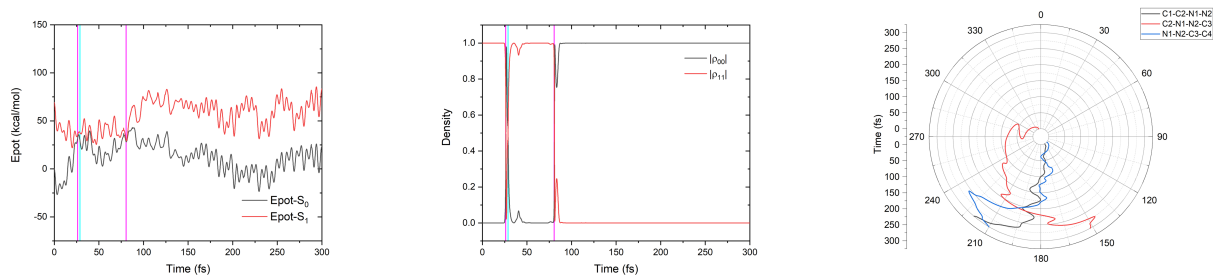

Figure S4: Time evolution of adiabatic potential energy (left), electronic populations (middle) and the dihedral angles C1-C2-N1-N2, C2-N1-N2-C3 and N1-N2-C3-C4 (right) for EBD/ $E+$ .

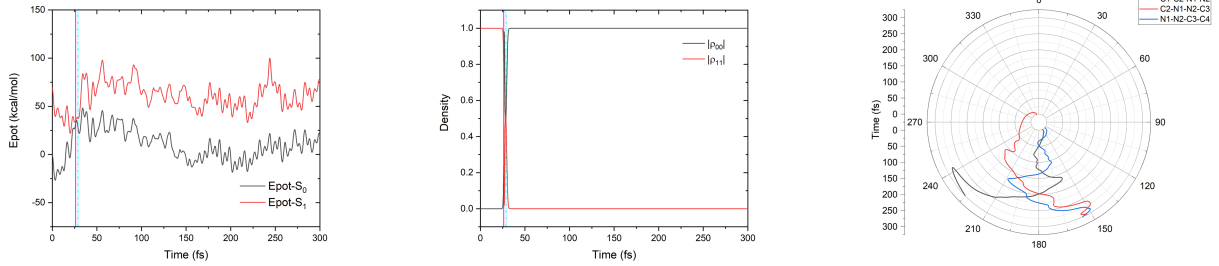

Figure S5: Time evolution of adiabatic potential energy (left), electronic populations (middle) and the dihedral angles C1-C2-N1-N2, C2-N1-N2-C3 and N1-N2-C3-C4 (right) for EBD/ $E_{p_h+}$ .

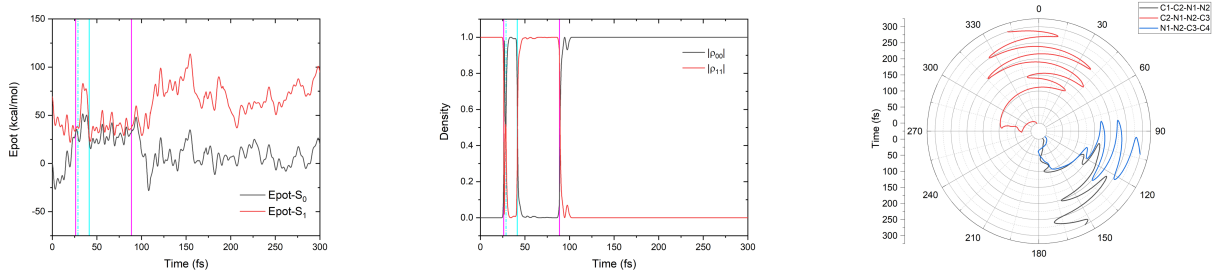

Figure S6: Time evolution of adiabatic potential energy (left), electronic populations (middle) and the dihedral angles C1-C2-N1-N2, C2-N1-N2-C3 and N1-N2-C3-C4 (right) for EBD/ $E_{p_h-}$ .

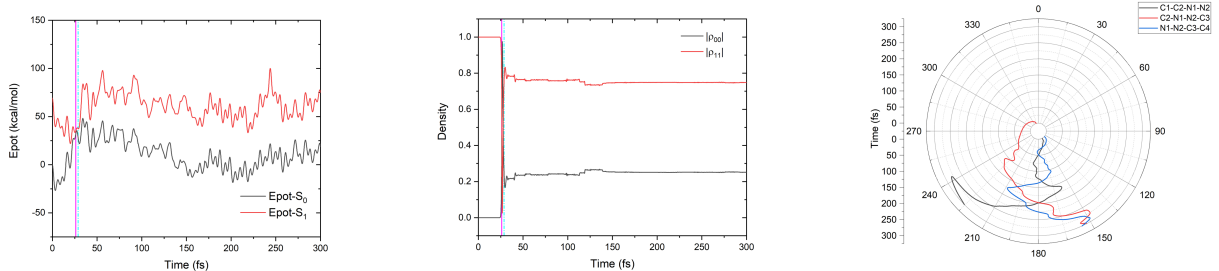

Figure S7: Time evolution of adiabatic potential energy (left), electronic populations (middle) and the dihedral angles C1-C2-N1-N2, C2-N1-N2-C3 and N1-N2-C3-C4 (right) for PCSH/ $E_{p_h+}$ .

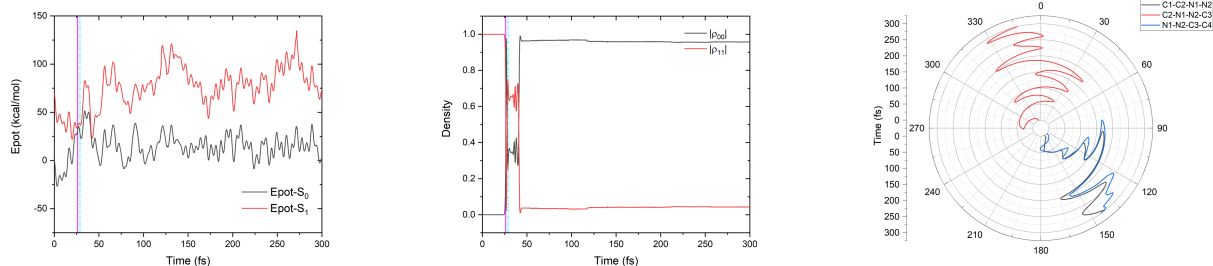

Figure S8: Time evolution of adiabatic potential energy (left), electronic populations (middle) and the dihedral angles C1-C2-N1-N2, C2-N1-N2-C3 and N1-N2-C3-C4 (right) for PCSH/ $E_{p_h-}$ .

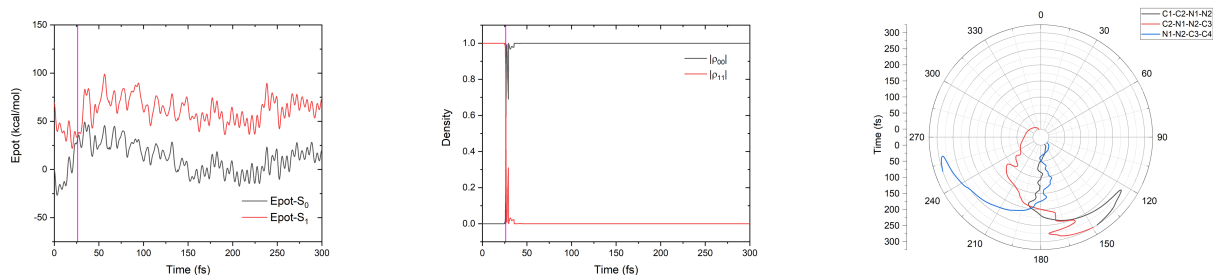

Figure S9: Time evolution of adiabatic potential energy (left), electronic populations (middle) and the dihedral angles C1-C2-N1-N2, C2-N1-N2-C3 and N1-N2-C3-C4 (right) for BCSH/ $E_+$ .

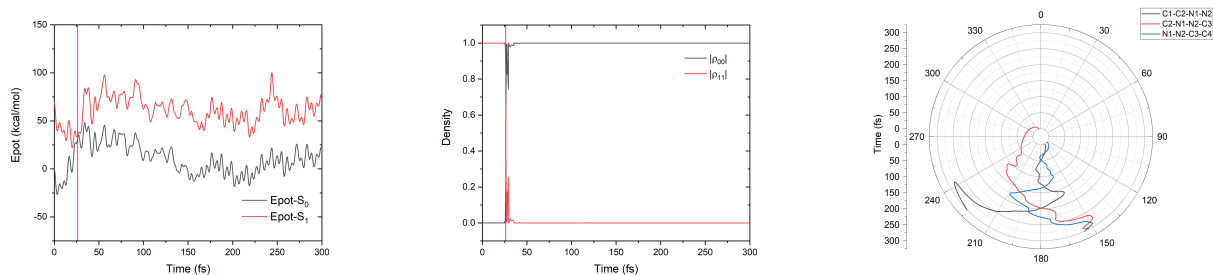

Figure S10: Time evolution of adiabatic potential energy (left), electronic populations (middle) and the dihedral angles C1-C2-N1-N2, C2-N1-N2-C3 and N1-N2-C3-C4 (right) for BCSH/ $E_{p_h+}$ .

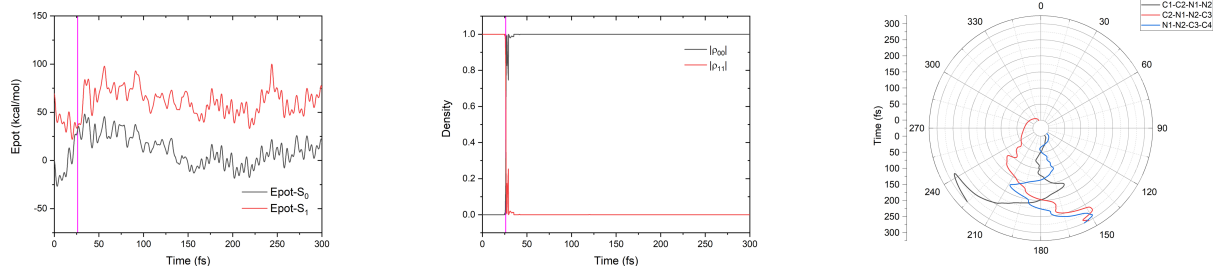

Figure S11: Time evolution of adiabatic potential energy (left), electronic populations (middle) and the dihedral angles C1-C2-N1-N2, C2-N1-N2-C3 and N1-N2-C3-C4 (right) for BCSH/ $E_{p_h-}$ .

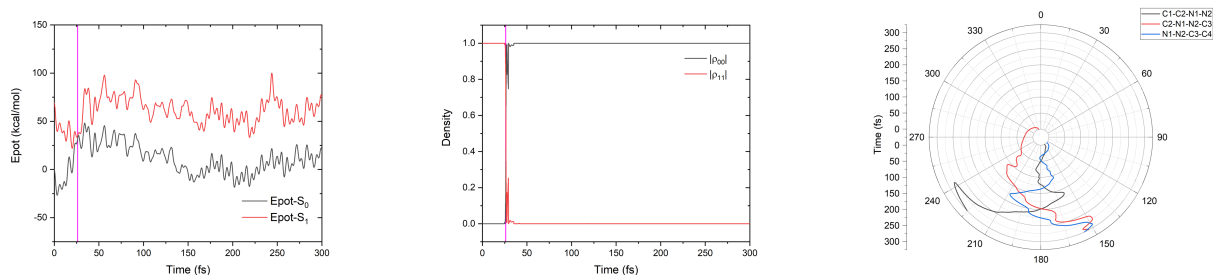

Figure S12: Time evolution of adiabatic potential energy (left), electronic populations (middle) and the dihedral angles C1-C2-N1-N2, C2-N1-N2-C3 and N1-N2-C3-C4 (right) for PC-BCSH/ $E_{p_h+}$ .

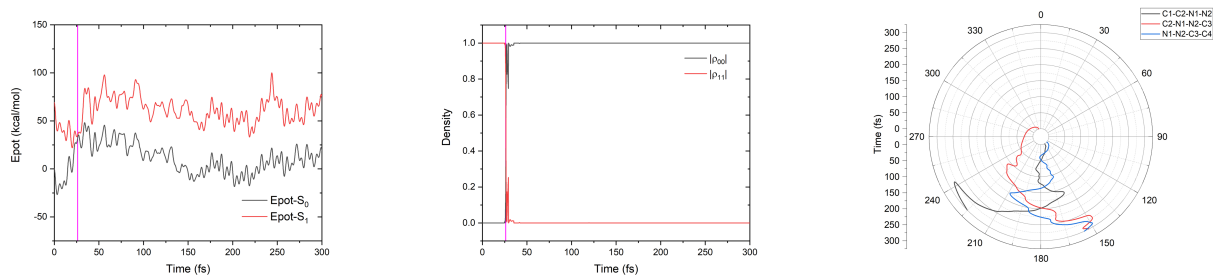

Figure S13: Time evolution of adiabatic potential energy (left), electronic populations (middle) and the dihedral angles C1-C2-N1-N2, C2-N1-N2-C3 and N1-N2-C3-C4 (right) for PC-BCSH/ $E_{p_h-}$ .

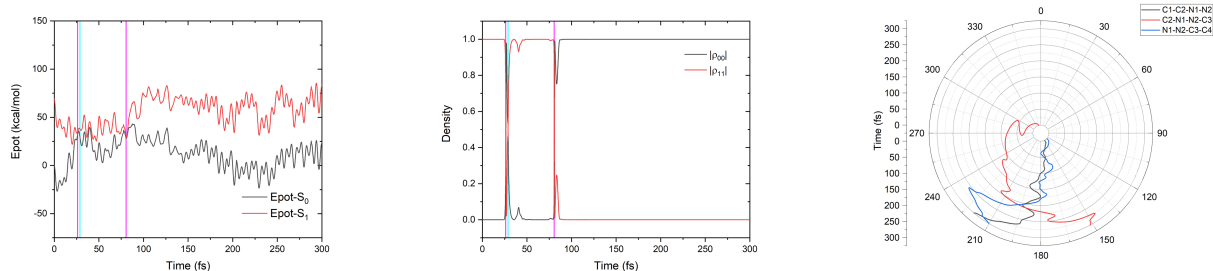

Figure S14: Time evolution of adiabatic potential energy (left), electronic populations (middle) and the dihedral angles C1-C2-N1-N2, C2-N1-N2-C3 and N1-N2-C3-C4 (right) for PC-EBD/E<sup>+</sup>.

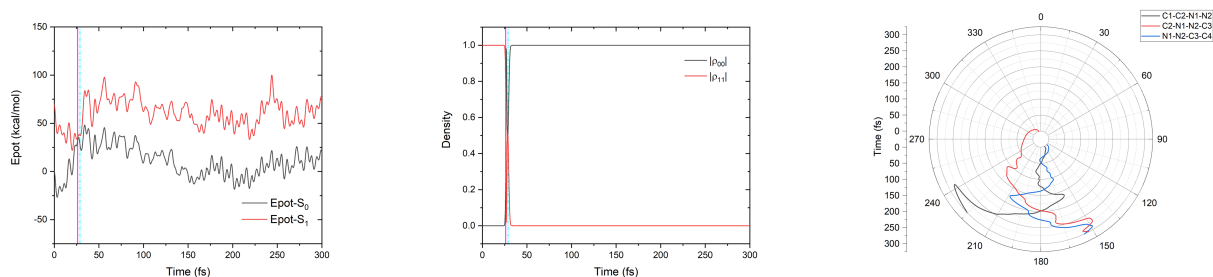

Figure S15: Time evolution of adiabatic potential energy (left), electronic populations (middle) and the dihedral angles C1-C2-N1-N2, C2-N1-N2-C3 and N1-N2-C3-C4 (right) for PC-EBD/E<sub>ph</sub><sup>+</sup>.

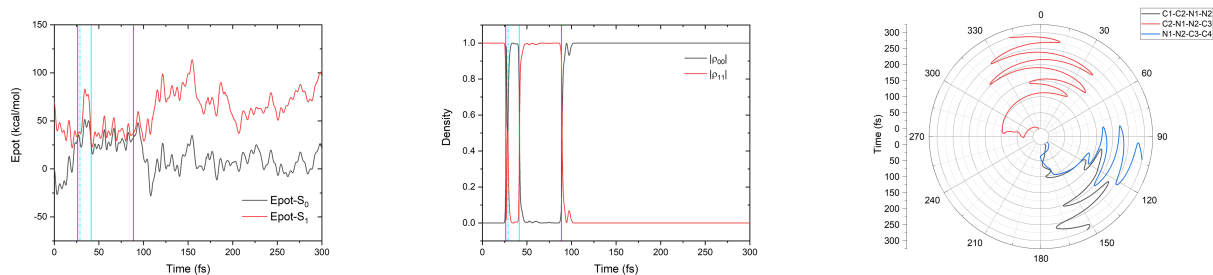

Figure S16: Time evolution of adiabatic potential energy (left), electronic populations (middle) and the dihedral angles C1-C2-N1-N2, C2-N1-N2-C3 and N1-N2-C3-C4 (right) for PC-EBD/E<sub>ph</sub><sup>-</sup>.



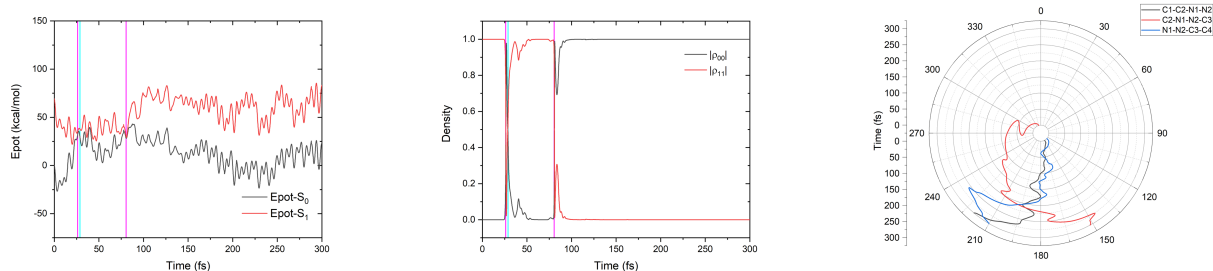

Figure S17: Time evolution of adiabatic potential energy (left), electronic populations (middle) and the dihedral angles C1-C2-N1-N2, C2-N1-N2-C3 and N1-N2-C3-C4 (right) for PC-FBD/E+.

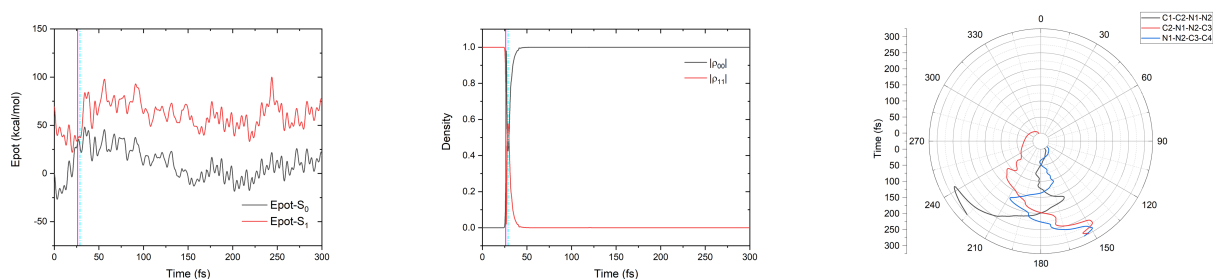

Figure S18: Time evolution of adiabatic potential energy (left), electronic populations (middle) and the dihedral angles C1-C2-N1-N2, C2-N1-N2-C3 and N1-N2-C3-C4 (right) for PC-FBD/E<sub>ph</sub>+.

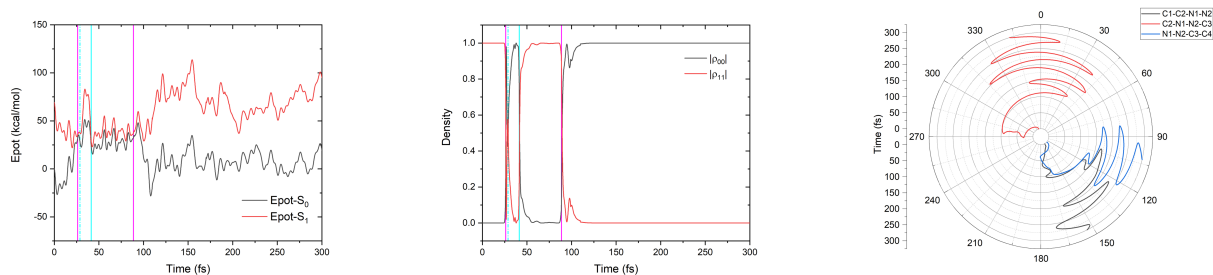

Figure S19: Time evolution of adiabatic potential energy (left), electronic populations (middle) and the dihedral angles C1-C2-N1-N2, C2-N1-N2-C3 and N1-N2-C3-C4 (right) for PC-FBD/E<sub>ph</sub>-.

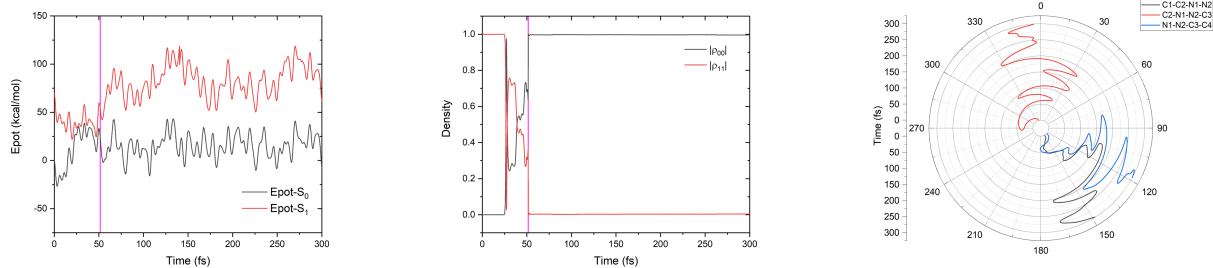

Figure S20: Time evolution of adiabatic potential energy (left), electronic populations (middle) and the dihedral angles C1-C2-N1-N2, C2-N1-N2-C3 and N1-N2-C3-C4 (right) for PC-MFSD.

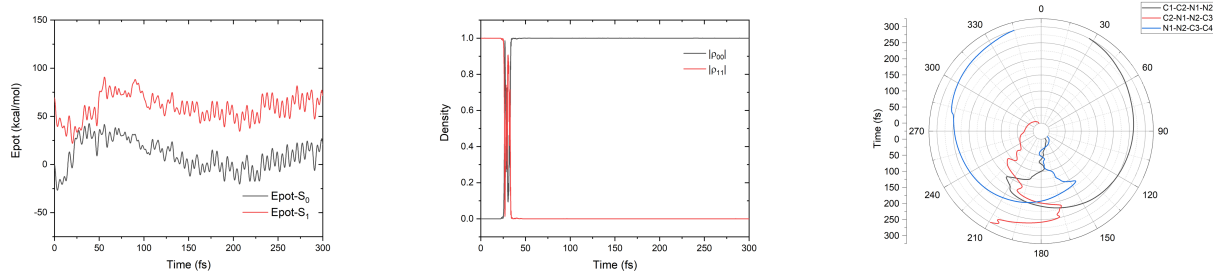

Figure S21: Time evolution of adiabatic potential energy (left), electronic populations (middle) and the dihedral angles C1-C2-N1-N2, C2-N1-N2-C3 and N1-N2-C3-C4 (right) for QTMF in which the decoherence rate was determined on-the-fly.

## Effects of Momentum Rescaling

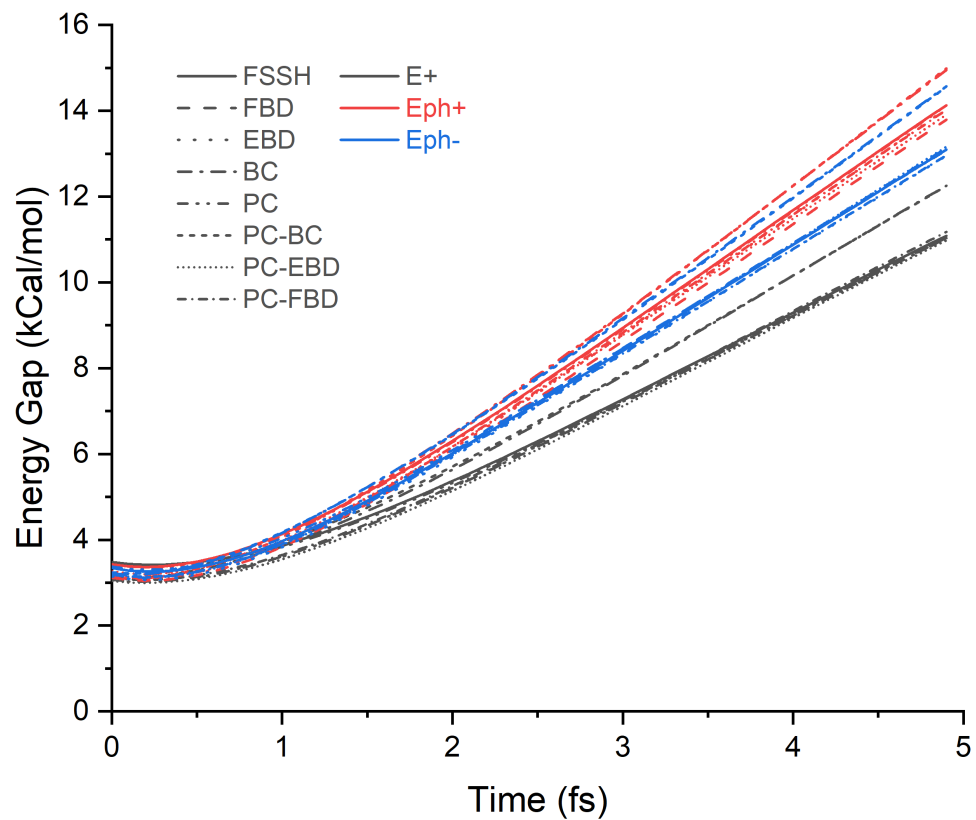

Figure S22: Energy gap between  $S_1$  and  $S_0$  plotted as a function of time after hopping event from  $S_1$  to  $S_0$  averaged on all trajectories using different models.

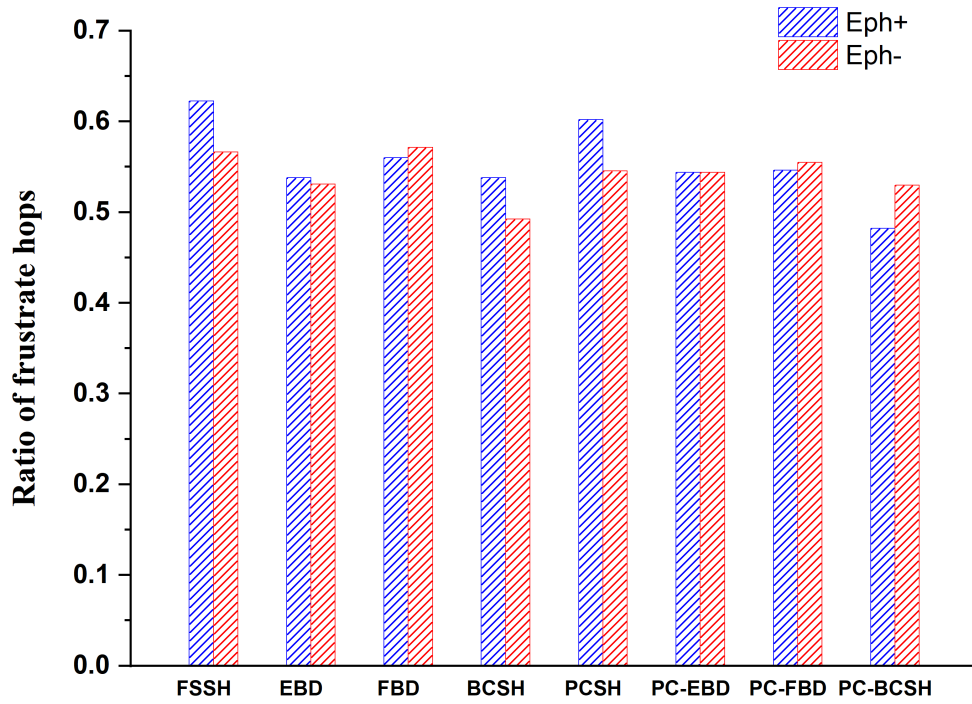

Figure S23: Ratio of frustrated hops in all hopping-back attempts using different decoherence corrections with  $E_{p_h+}$  and  $E_{p_h-}$ .

# Distribution of Essential Geometry Parameters of Snapshots at which the Hop Occurs

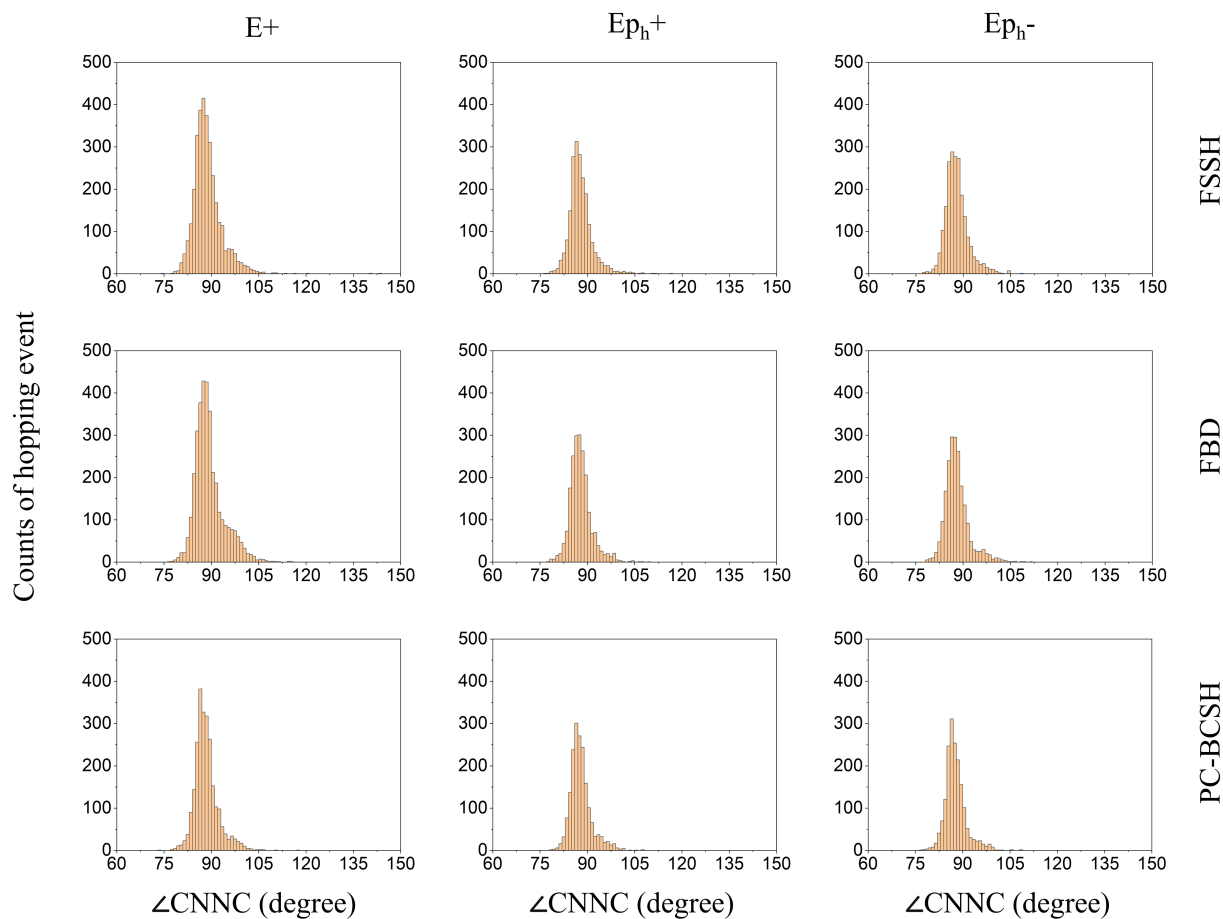

Figure S24: Distribution of C-N-N-C dihedral angle for all hopping events obtained using FSSH (top), FBD (middle) and PC-BCSH (bottom).

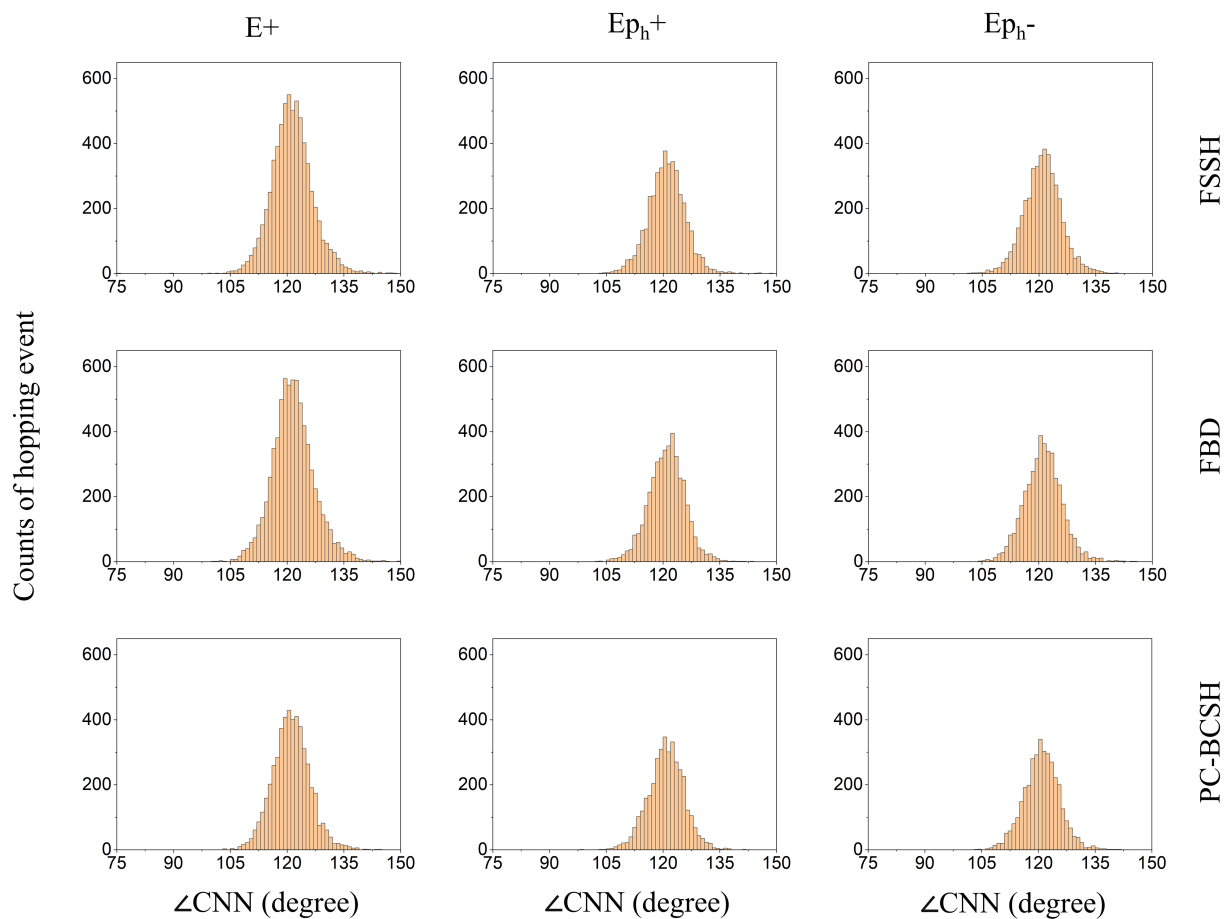

Figure S25: Distribution of C-N-N bending angles for all hopping events obtained using FSSH (top), FBD (middle) and PC-BCSH (bottom).

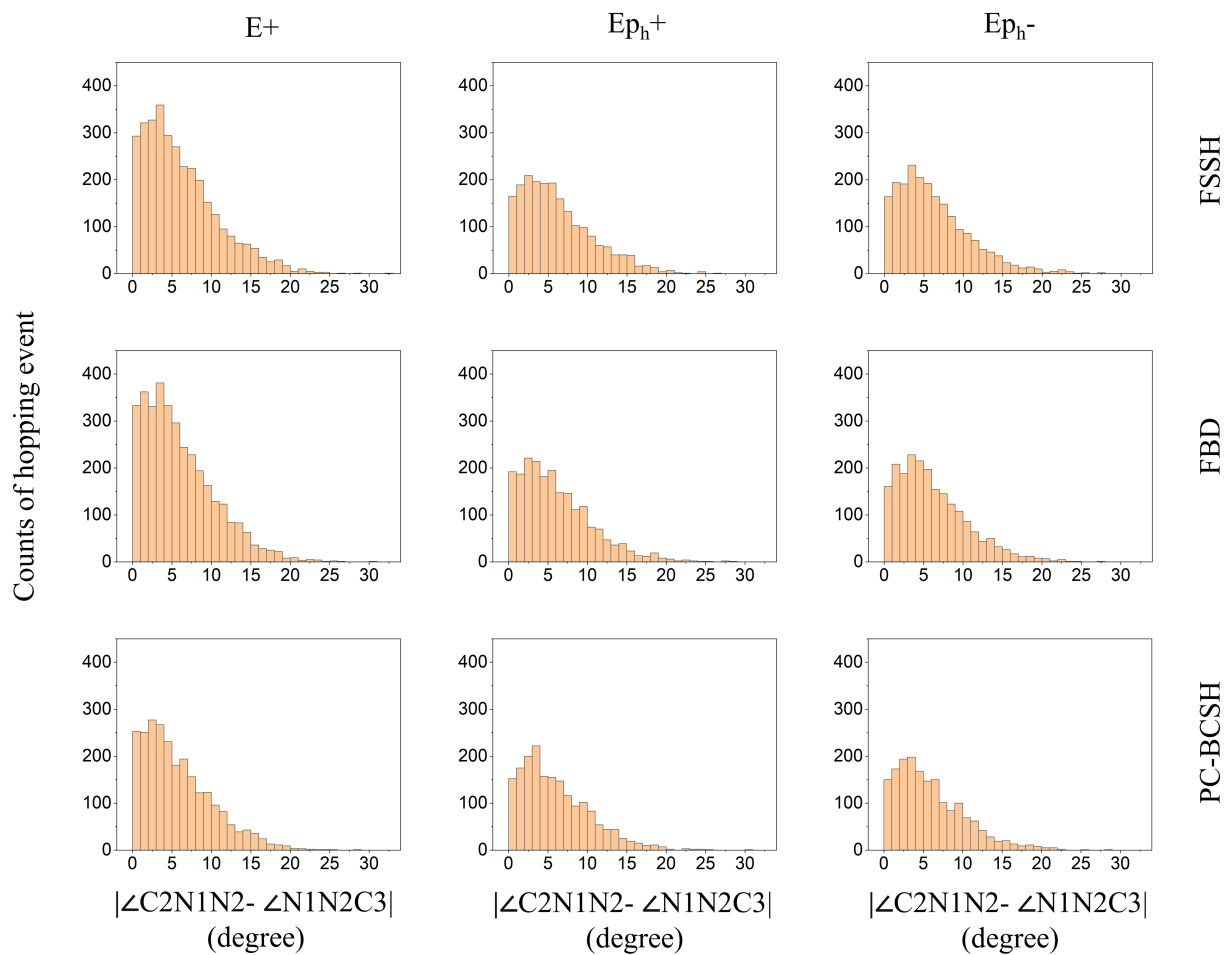

Figure S26: Distribution of the difference between two C-N-N bending angles for all hopping events obtained using FSSH (top), FBD (middle) and PC-BCSH (bottom).

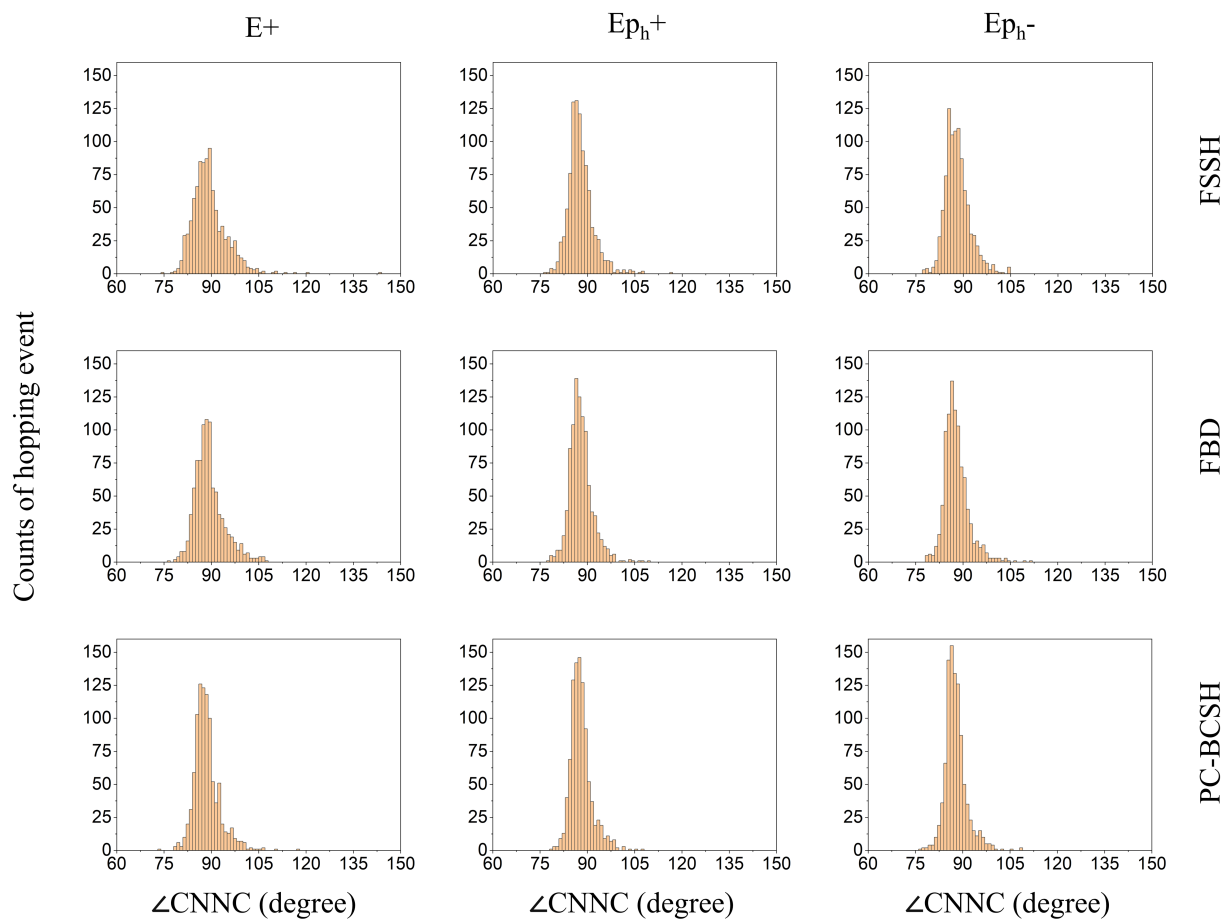

Figure S27: Distribution of C-N-N-C dihedral angle for the last  $S_1 \rightarrow S_0$  hopping event for each trajectory using FSSH (top), FBD (middle) and PC-BCSH (bottom).

## Data Availability

Source code and research data used in this study are available upon reasonable request to the corresponding author.
